# Supplementary material for: BcMtg2 is required for multiple stress tolerance, vegetative development and virulence in Botrytis cinerea
Source: PubMed Central journal article supplement (PMC4921815; doi:10.1038/srep28673), 2016-06-27
Supplement: srep28673-s1.pdf [file srep28673-s1.pdf]

# Scientific Report

**BcMtg2 is required for multiple stress tolerance, vegetative development and virulence in *Botrytis cinerea***

**Wenyong Shao, Yu Zhang, Jin Wang, Chiyuan Lv and Changjun Chen\***

College of Plant Protection, Nanjing Agricultural University,  
Nanjing 210095, Jiangsu, China

Corresponding author: Changjun Chen

Phone: 086-25-84395641;

Fax: 086-25-84395641;

E-mail: changjun-chen @njau.edu.cn

## Figure S1

Amino acid alignments of *Botrytis cinerea* Mtg2 (BcMtg2) with those of *Neurospora crassa* Mtg2 (NcMtg2), *Candida albicans* Mtg2 (CaMtg2), *Aspergillus nidulans* Mtg2 (AnMtg2), *Magnaporthe oryzae* Mtg2 (MoStr), *Fusarium graminearum* Mtg2 (FgMtg2), *Fusarium oxysporum* (FoMtg2), *Schizosaccharomyces pombe* Mtg2 (SpMtg2), *Saccharomyces cerevisiae* Mtg2 (ScMtg2) and *Sclerotinia sclerotiorum* Mtg2 (SsMtg2). Boxshade program was used to highlight identical (black shading) and similar (grey shading) amino acids. The conserved N-terminal pyridoxal phosphate binding pocket and the C-terminal catalytic residue domain are underlined. Phylogenetic relationship of the Mtg2 gene among *Botrytis cinerea* and other plant pathogens based on amino acid sequence.



## Figure S2

Generation and identification of the BcMtg2 deletion mutant of *Botrytis cinerea*. (A) Gene replacement strategy for BcMtg2. The hygromycin resistance cassette (hph) is denoted by the large grey arrow. Primer (P3–P18) binding sites are indicated by arrows (see Table S1 for the primer sequences). (B) Southern blot hybridization analysis of strains using the 3'-flanking region of BcMtg2 as a probe. Genomic DNA of the wild-type progenitor B05.10, BcMtg2 deletion mutant  $\Delta$ BcMtg2 and complemented strain  $\Delta$ BcMtg2C were digested with XhoI. (C) Primer pair P11/P12 was used to specifically amplify the partial BcMtg2. (D) Primer pair P13/P14 was used to validate the selectable marker hph. (E, F) Primer pairs P15/P16 and P17/P18 were used to amplify the two homologous arms with a partial fragment of the connecting area.

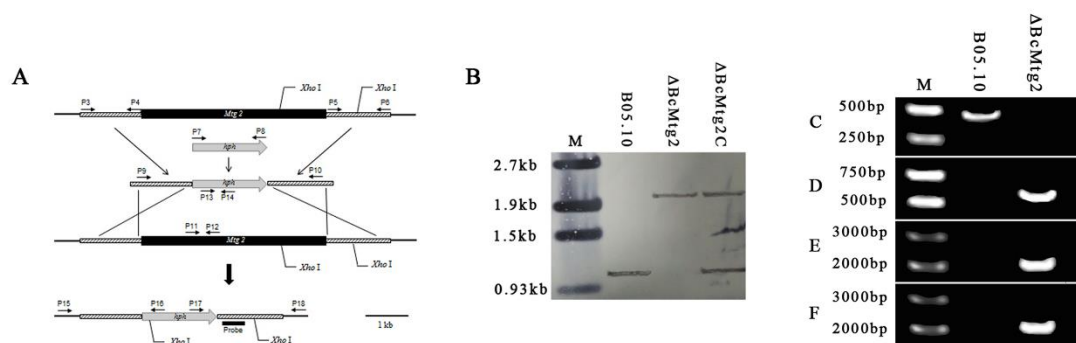

**Table S1**

Primers used in this study

| Primer code | Sequence (5'→3')                          | Relevant characteristic                                                                                       |
|-------------|-------------------------------------------|---------------------------------------------------------------------------------------------------------------|
| P1          | ATGCCTCCACGTTGTTCAAC                      | Amplify the full cDNA sequence of the <i>Mtg2</i> gene                                                        |
| P2          | TCATCCATCAAGAAGACCAAC                     |                                                                                                               |
| P3          | TTCGTATGAAGCCGTATGT                       | Amplify the left homologous arm of the <i>Mtg2</i> gene of <i>B. cinerea</i> (1444 bp)                        |
| P4          | CCACCAGCCAGCCAACAGCTCCCAGCTGTGCGAGCTGGAGA |                                                                                                               |
| P5          | CAATACGCAAACCGCCTCTCCCAGTATTTACGGATAGAGGC | Amplify the right homologous arm of the <i>Mtg2</i> gene of <i>B. cinerea</i> (1517 bp)                       |
| P6          | CAATGAGTTATGGAGGTG                        |                                                                                                               |
| P7          | GGGAGCTGTTGGCTGGCTGGTGG                   | Amplify the <i>hph</i> gene (1764 bp)                                                                         |
| P8          | GGGAGAGGCGGTTTGCGTATTG                    |                                                                                                               |
| P9          | AATGGTGAAGGCTCTGCTGT                      | Amplify the knockout vector of the <i>Mtg2</i> gene of <i>B. cinerea</i> (4471 bp)                            |
| P10         | ATGAGTTATGGAGGTGGGT                       |                                                                                                               |
| P 11        | AGTTACCACATTGGAGCCG                       | Amplify a partial fragment of the <i>Mtg2</i> gene of <i>B. cinerea</i> (437 bp)                              |
| P 12        | GGGAGATTAGGTGCGAGGG                       |                                                                                                               |
| P 13        | CAAAGCATCAGCTCATCGAGAG                    | Amplify a partial fragment of the <i>hph</i> gene (503 bp)                                                    |
| P 14        | GAAAAGTTCGACAGCGTCTCC                     |                                                                                                               |
| P 15        | GGGTAGTTGGCATGAAAG                        | Confirm whether the <i>hph</i> genes homologously replaced the <i>Mtg2</i> gene of <i>B. cinerea</i> (2154bp) |
| P 16        | GTACTCGCCGATAGTGGA                        |                                                                                                               |
| P 17        | TCATTGGATGCTTGGGTAG                       | Confirm whether the <i>hph</i> genes homologously replaced the <i>Mtg2</i> gene of <i>B. cinerea</i> (2049bp) |

|                                              |                                                                                             |
|----------------------------------------------|---------------------------------------------------------------------------------------------|
| P 18 CTTATGGATCTCGGTAGTGC                    |                                                                                             |
| P19 CTGCAGAAccaccatgttggGTCGACAGAAGATGATATTG | Amplify the NEO cassette containing a trpC promoter (1181 bp)                               |
| P20 CCGctcgagTCAGAAGAAGCTCGTCAAGAAGGCG       |                                                                                             |
| P21 TCCcccgggGGAATTTGGTTTCCGAGGTA            | Amplify the <i>Mtg2</i> gene (include the control region of the <i>Mtg2</i> gene) (2614 bp) |
| P22 GCtctagaGC ATCCAGCGTTTCGTGTA             |                                                                                             |
| P23 TATCTGTCACAAGTGGCGTAT                    | Amplify a probe for Southern blotting (241 bp)                                              |
| P24 AAGAATGTTCCCTTCCTCCC                     |                                                                                             |
| P25 TAGGTGATTTGGGACAACAGAG                   | Amplify the <i>BcBos1</i> gene for quantitative real-time PCR                               |
| P26 GTCTCTCAATGGTGCGGATAG                    |                                                                                             |
| P27 GAAGGATGGAAGGGTCTTGTAG                   | Amplify the <i>BcSak</i> gene for quantitative real-time PCR                                |
| P28 CTAAGTCCGGAGAAAGCCTGATG                  |                                                                                             |
| P29 GCTACGCCTATGGGAAGTAATG                   | Amplify the <i>BcMkk1</i> gene for quantitative real-time PCR                               |
| P30 CTACTTTCGCTTCCTCCACTG                    |                                                                                             |
| P31 GGCAAGTTGAAGGAGCAAATC                    | Amplify the <i>BcGls</i> gene for quantitative real-time PCR                                |
| P32 ATCTGGTGCGTGTGTGATAG                     |                                                                                             |
| P33 CGTCTGGATTGGTGGTTCTATT                   | Amplify the reference gene actin for quantitative real-time PCR                             |
| P34 ACTCGTCGTAATCTTGTCTTTG                   |                                                                                             |
| P35 CGggatccCGATGCCTCCACGTTGTTCAAC           | the full cDNA sequence of the <i>BcMtg2</i> gene for construction of pYES2-BcMtg2           |
| P36 GCtctagaGCTCATCCATCAAGAAGACCAAC          |                                                                                             |
